# Supplementary material
Source: PubMed Central journal article supplement (PMC7825089)
Supplement: sbaa087_suppl_supplement_material.pdf [file sbaa087_suppl_supplement_material.pdf]

**Association between circulating lipids and future weight gain in individuals  
with an at-risk mental state and in first-episode psychosis**

Santosh Lamichhane *et al.*

**Supplementary Material**

**Supplementary Table 1:** Description of lipid clusters.

| <b>Cluster</b> | <b>Summary composition</b> | <b>Representative lipids, examples</b>                                 |
|----------------|----------------------------|------------------------------------------------------------------------|
| LC1            | Major PCs, TGs, Minor CEs  | PC(34:3), PC(36:4), PC(40:4), PC(O-36:3), TG(18:0/18:0/18:0), TG(56:4) |
| LC2            | Major PCs, Minor CEs       | PC(36:4), PC(34:2), CE(18:1)                                           |
| LC3            | PCs only                   | PC(38:6), PC(40:6)                                                     |
| LC4            | Cer only                   | Cer(d18:1/22:0)                                                        |
| LC5            | LPCs only                  | LPC(16:1), LPC(20:3)                                                   |
| LC6            | PCs and SMs                | PC(16:0/16:0), PC(O-38:4), SM(d18:1/12:0)                              |
| LC7            | PCs                        | PC(38:2), PC(38:3)                                                     |
| LC8            | PCs                        | PC(38:3), PC(38:4)                                                     |
| LC9            | PCs                        | PC(O-36:3), PC(O-36:4)                                                 |
| LC10           | PEs only                   | PE(34:2), PE(38:6)                                                     |
| LC11           | SMs                        | SM(d36:0), SM(d36:1)                                                   |
| LC12           | SMs                        | SM(d38:1), SM(d38:2)                                                   |
| LC13           | TGs                        | TG(14:0/16:0/18:1), TG(48:1)                                           |
| LC14           | TGs                        | TG(14:0/18:1/18:1), TG(47:2), TG(48:0)                                 |
| LC15           | TGs                        | TG(48:3), TG(53:4)                                                     |
| LC16           | TGs                        | TG(16:0/18:0/18:1), TG(50:0)                                           |
| LC17           | TGs                        | TG(16:0/18:2/18:2), TG(18:1/18:2/18:2)                                 |
| LC18           | TGs                        | TG(18:1/18:1/16:0), TG(18:2/18:1/16:0)                                 |
| LC19           | TGs                        | TG(18:1/18:1/16:0), TG(18:1/18:1/18:1)                                 |
| LC20           | TGs                        | TG(50:3)                                                               |
| LC21           | TGs                        | TG(52:3)                                                               |
| LC22           | TGs                        | TG(54:2)                                                               |

**Supplementary Table 2.** Correlation between baseline TGs and change in BMI (12-month follow-up vs. baseline) in FEP patients.

|   | <b>Lipid ID</b>    | <b>p-values</b> |
|---|--------------------|-----------------|
| 1 | TG(48:0)           | 0.0191          |
| 2 | TG(47:0)           | 0.021           |
| 3 | TG(48:0)           | 0.0237          |
| 4 | TG(47:1)           | 0.0245          |
| 5 | TG(48:1)           | 0.0252          |
| 6 | TG(48:1)           | 0.0252          |
| 7 | TG(14:0/16:0/18:1) | 0.0366          |
| 8 | TG(16:0/16:0/16:0) | 0.0419          |
| 9 | TG(49:0)           | 0.043           |

**Supplementary Table 3.** Correlation between baseline TGs and change in BMI (12-month follow-up vs. baseline) in CHR individuals.

|    | <b>Lipid ID</b>                             | <b>p-values</b> |
|----|---------------------------------------------|-----------------|
| 1  | TG(14:0/16:0/18:1)                          | 0.0001          |
| 2  | TG(14:0/18:1/18:1)                          | 0.0001          |
| 3  | TG(14:0/18:2/18:2)                          | 0.001           |
| 4  | TG(14:0/18:2/18:2)                          | 0.0021          |
| 5  | TG(16:0/16:0/16:0)                          | 0.003           |
| 6  | TG(16:0/18:0/18:1)                          | 0.003           |
| 7  | TG(16:0/18:2/18:2)                          | 0.0037          |
| 8  | TG(16:0/18:2/18:3)                          | 0.0041          |
| 9  | TG(16:0/18:2/22:6)                          | 0.0041          |
| 10 | TG(16:0/18:2/22:6)                          | 0.0041          |
| 11 | TG(16:0/22:5/18:1) or<br>TG(20:4/18:1/18:1) | 0.0041          |
| 12 | TG(16:0/22:5/18:1) or<br>TG(20:4/18:1/18:1) | 0.0041          |
| 13 | TG(18:0/18:0/18:0)                          | 0.0067          |
| 14 | TG(18:0/18:1/20:4)                          | 0.0067          |
| 15 | TG(18:0/18:1/20:4)                          | 0.0073          |
| 16 | TG(18:1/12:0/18:1) or<br>TG(18:2/16:0/14:0) | 0.0103          |
| 17 | TG(18:1/18:1/16:0)                          | 0.0103          |
| 18 | TG(18:1/18:1/18:1)                          | 0.0112          |
| 19 | TG(18:1/18:1/22:6)                          | 0.0165          |
| 20 | TG(18:1/18:1/22:6)                          | 0.0205          |
| 21 | TG(18:1/18:2/18:2)                          | 0.0205          |
| 22 | TG(18:1/18:2/18:2)                          | 0.0205          |
| 23 | TG(18:2/18:1/16:0)                          | 0.022           |
| 24 | TG(18:2/18:1/18:1)                          | 0.0235          |
| 25 | TG(18:2/18:1/18:1)                          | 0.0252          |
| 26 | TG(18:2/18:2/18:2) or<br>TG(18:3/18:2/18:1) | 0.0252          |
| 27 | TG(18:2/18:2/18:2) or<br>TG(18:3/18:2/18:1) | 0.0269          |
| 28 | TG(18:2/18:2/18:2) or<br>TG(18:3/18:2/18:1) | 0.0413          |
| 29 | TG(18:2/22:5/16:0)                          | 0.0438          |
| 30 | TG(18:2/22:5/16:0)                          | 0.0438          |
| 31 | TG(37:0)                                    | 0.0463          |
| 32 | TG(45:0)                                    | 0.0463          |

**Supplementary Table 4.** Information on CPZ-equivalents medication type and 1-year follow-up diagnoses in samples from Turku/Finland

|                                                                     | CTR | FEP                  | CHR               |
|---------------------------------------------------------------------|-----|----------------------|-------------------|
| Antipsychotic Baseline (Turku, Finland)                             |     |                      |                   |
| Olanzapine (n)                                                      | N/A | 5                    | 4                 |
| Paliperidone (n)                                                    |     | 2                    | N/a               |
| Perphenazine (n)                                                    |     | 2                    | N/a               |
| Quetiapine (n)                                                      |     | 1                    | 2                 |
| Risperidone (n)                                                     |     | 13                   | 2                 |
| Follow up Antipsychotic CPZE ( $\pm$ SD)<br>(n = 23 FEP, n = 3 CHR) | N/A | 235.3 ( $\pm$ 197.4) | 635 ( $\pm$ 60.6) |
| Antipsychotic Follow up (Turku, Finland)                            |     |                      |                   |
| Olanzapine(n)                                                       | N/A | 4                    | N/a               |
| Olanzapine, Quetiapine                                              |     | 1                    | N/a               |
| Risperidone, Olanzapine (n)                                         |     | 1                    | N/a               |
| Aripiprazole, Olanzapine (n)                                        |     | N/a                  | 1                 |
| Olanzapine, Risperidone (n)                                         |     | N/a                  | 1                 |
| Paliperidone (n)                                                    |     | 3                    | N/a               |
| Perphenazine (n)                                                    |     | 1                    | N/a               |
| Quetiapine (n)                                                      |     | 1                    | N/a               |
| Risperidone (n)                                                     |     | 5                    | N/a               |
| Aripiprazole (n)                                                    |     | 1                    | 1                 |
| Clozapine(n)                                                        |     | 1                    | N/a               |
| 1 year Follow up diagnosis                                          |     |                      |                   |
| Psychosis NOS                                                       |     | 6                    |                   |
| Schizophrenia                                                       | N/A | 6                    | N/A               |
| Schizophreniform disorder                                           |     | 5                    |                   |
| Bipolar disorder                                                    |     | 2                    |                   |
| Delusional disorder                                                 |     | 2                    |                   |
| Schizoaffective disorder                                            |     | 2                    |                   |

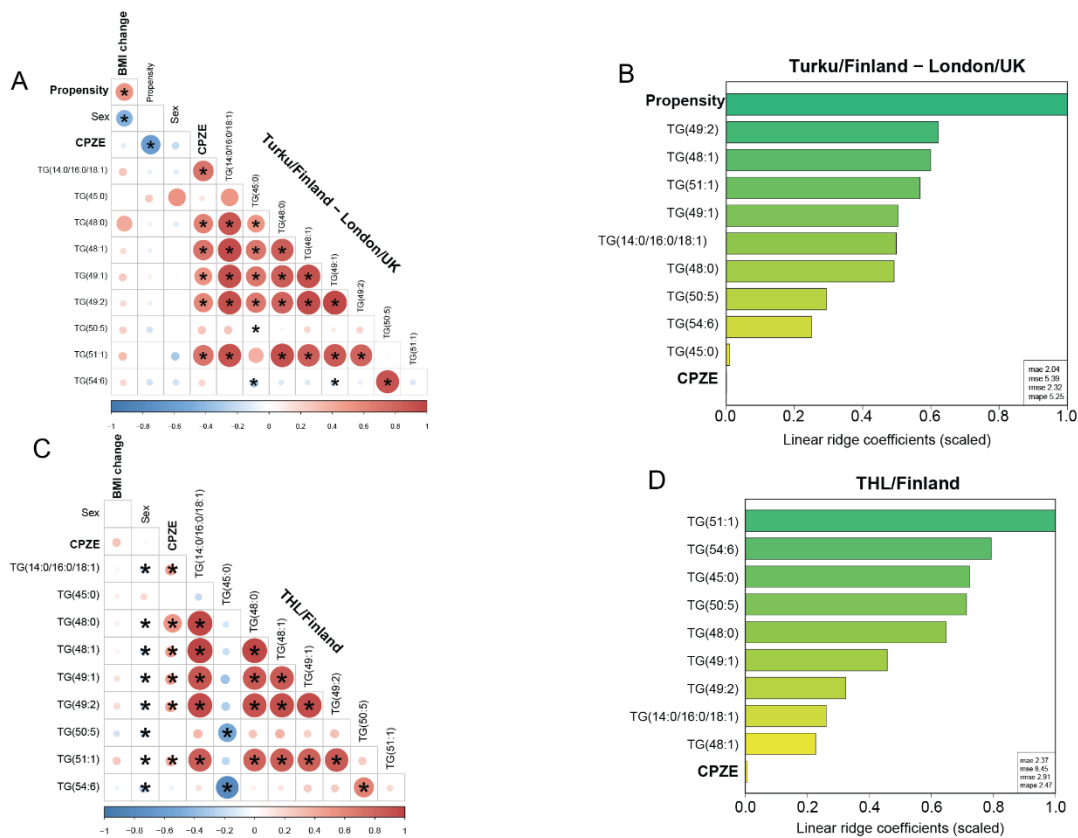

**Supplementary Figure 1.** Spearman rank regression coefficients showing the correlation between the effect of antipsychotic medication and nine selected baseline TG concentrations that were associated weight gain in FEP patients **A)** Turku/Finland, London/UK and **C)** THL/Finland. A regularized linear-ridge regression model to evaluate the effect of antipsychotic medication and nine selected baseline TG concentrations on the weight gain in FEP patients. The ridge coefficients from the regression model suggests that, the dose of antipsychotics medication is least contributing than the selected TGs towards the weight gain samples from **B)** Turku/Finland, London/UK and **D)** THL/Finland.
